# Supplementary material for: Impact of the Hydrolysis and Methanolysis of Bidesmosidic Chenopodium quinoa Saponins on Their Hemolytic Activity
Source: MDPI journal article supplement (doi:10.3390/molecules27103211), 2022-05-17
Supplement: s1 [file s1]

# Impact of the Hydrolysis and Methanolysis of Bidesmosidic *Chenopodium quinoa* Saponins on Their Hemolytic Activity

Philippe Savarino<sup>1</sup>, Carolina Contino<sup>1</sup>, Emmanuel Colson<sup>1</sup>, Gustavo Cabrera-Barjas<sup>2</sup>, Julien De Winter<sup>1</sup> and Pascal Gerbaux<sup>1,\*</sup>

<sup>1</sup>Organic Synthesis and Mass Spectrometry Laboratory (S<sup>2</sup>MOs), University of Mons, 23 Place du Parc, 7000 Mons, Belgium

<sup>2</sup>Unidad de Desarrollo Tecnológico (UDT), Universidad de Concepción, Av. Cordillera 2634, Parque Industrial Coronel, Coronel P.O. Box 4051 mail 3, Región del BíoBío, Chile

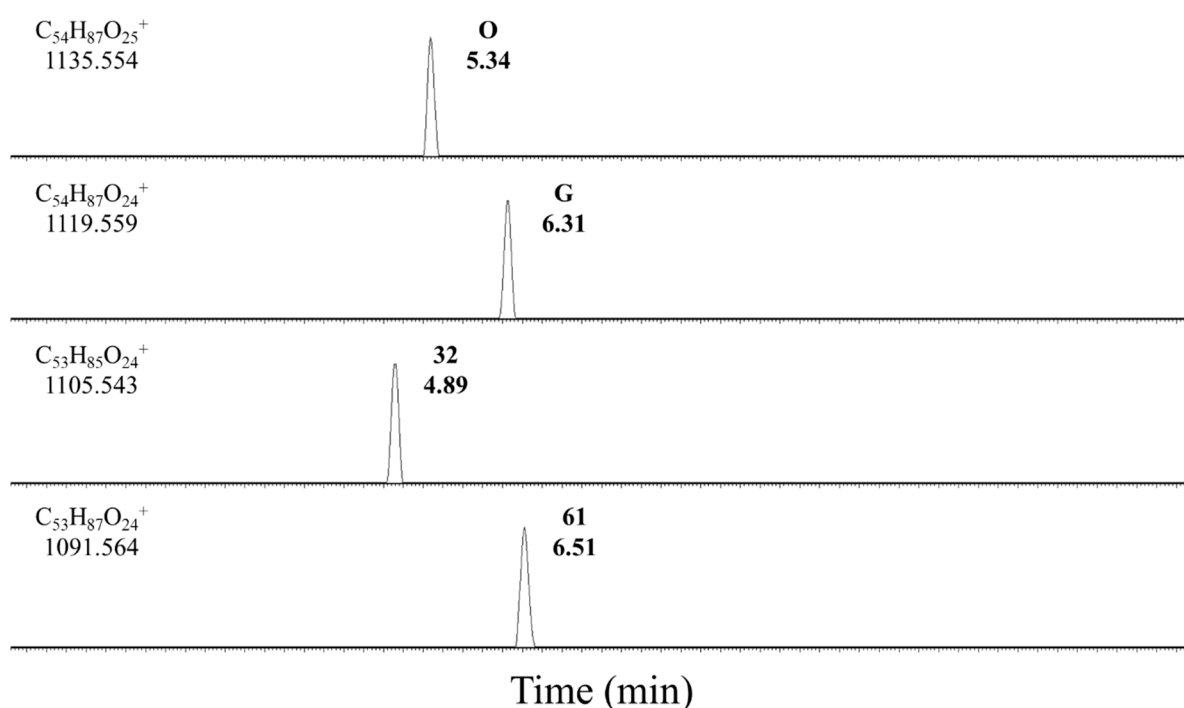

**Figure S1.** LC-MS analysis of the natural saponin extract: EIC (Extracted Ion Current Chromatogram) of *m/z* 1135, *m/z* 1119, *m/z* 1105, and *m/z* 1091, respectively corresponding to [M+H]<sup>+</sup> ions of extracted bidesmosidic [3+1] saponins from *Chenopodium quinoa* husk.

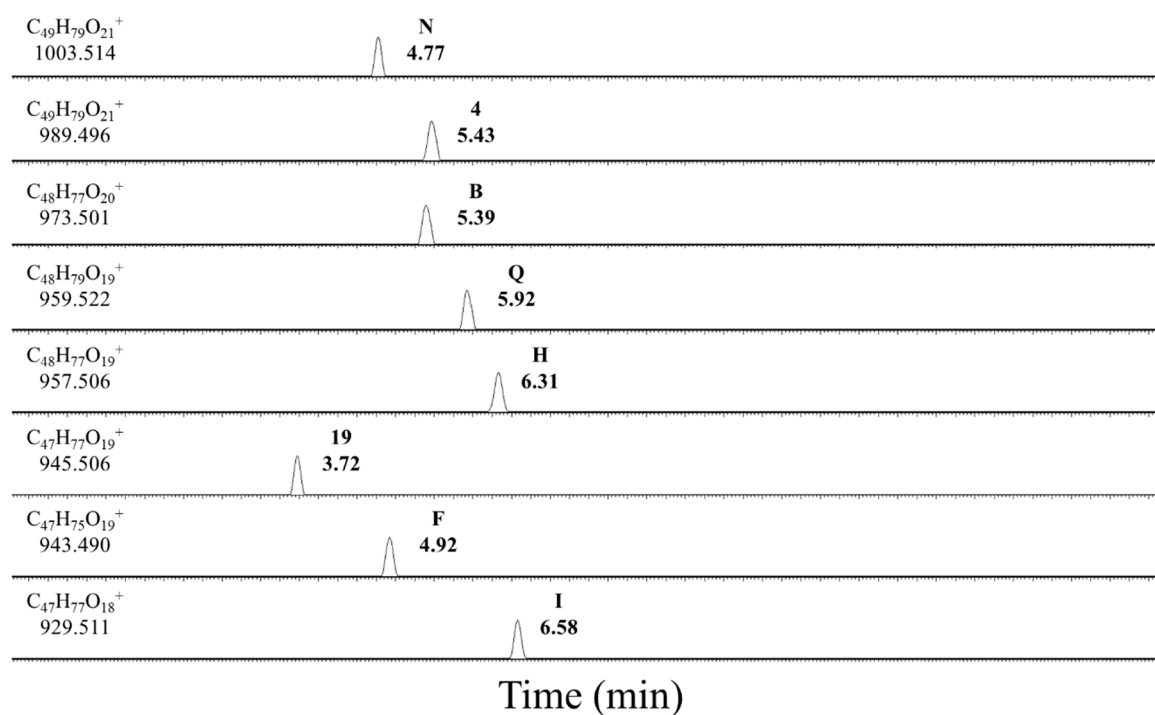

**Figure S2.** LC-MS analysis of the natural saponin extract: EIC (Extracted Ion Current Chromatogram) of  $m/z$  1003,  $m/z$  989,  $m/z$  973,  $m/z$  959,  $m/z$  957,  $m/z$  945,  $m/z$  943, and  $m/z$  921, respectively corresponding to  $[M+H]^+$  ions of extracted bidesmosidic [2+1] saponins from *Chenopodium quinoa* husk.

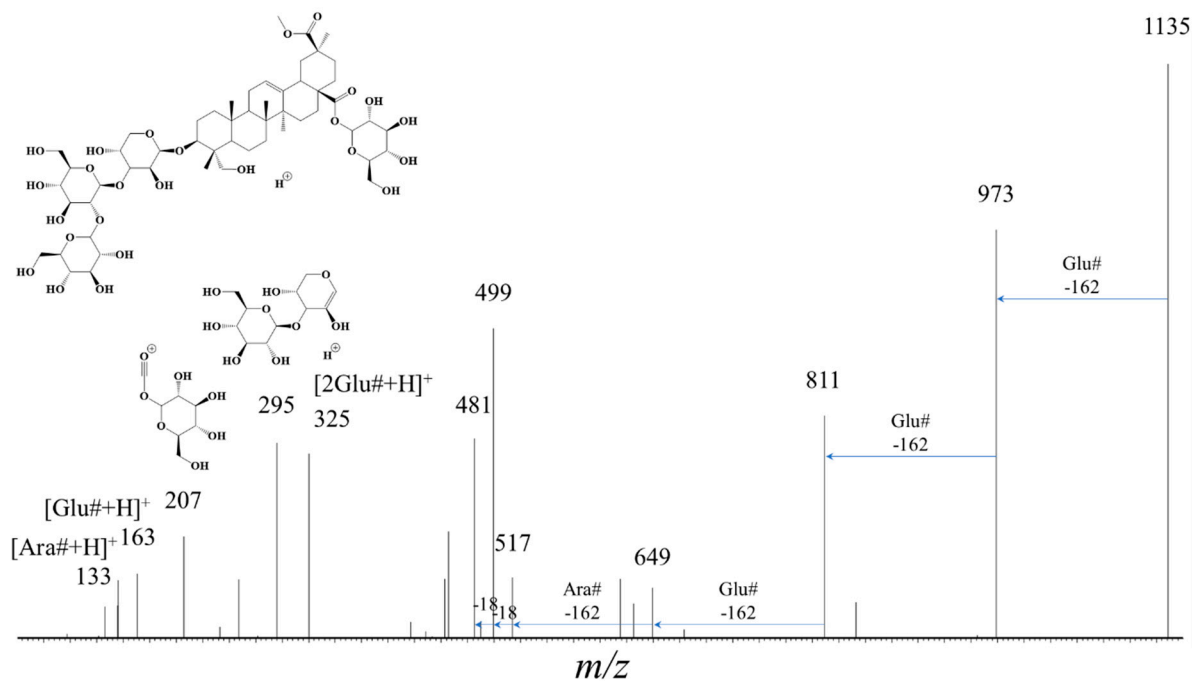

**Figure S3.** LC-MSMS(+) analysis of *Chenopodium quinoa* husk saponin extract: CID spectrum (10 eV) recorded for the  $m/z$  1135 precursor ions  $[M+H]^+$  at 5.34 min retention time (Saponin O).

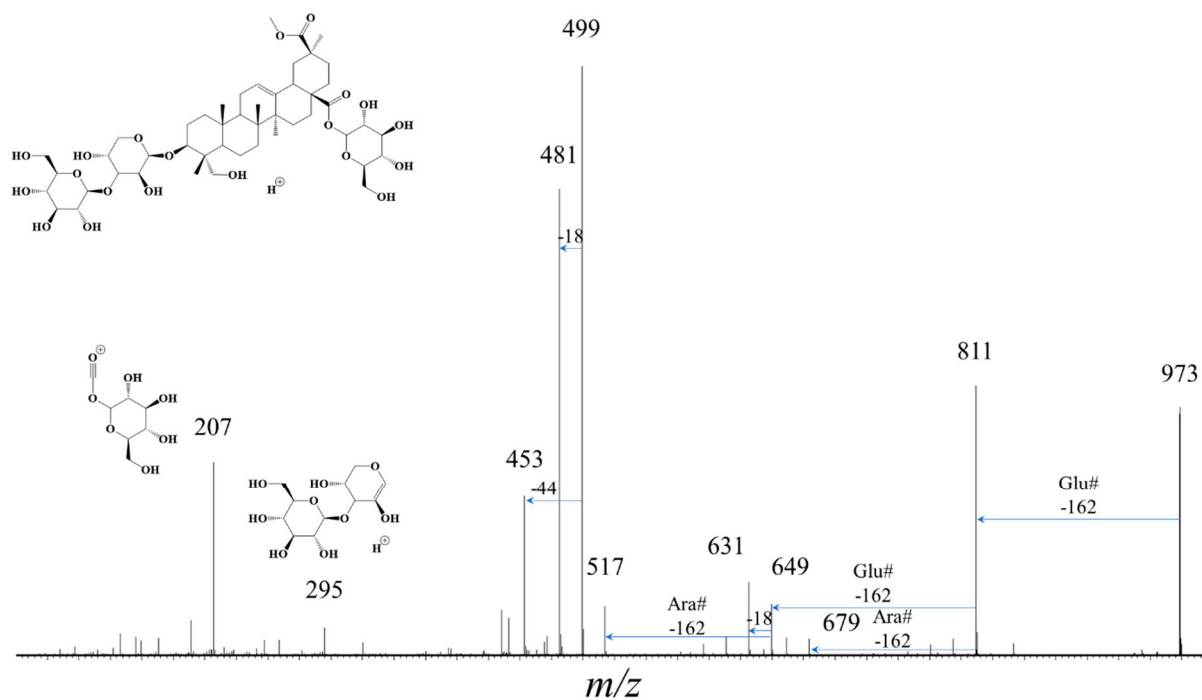

**Figure S4.** LC-MSMS(+) analysis of *Chenopodium quinoa* husk saponin extract: CID spectrum (10 eV) recorded for the  $m/z$  973 precursor ions  $[M+H]^+$  at 5.39 min retention time (Saponin B).

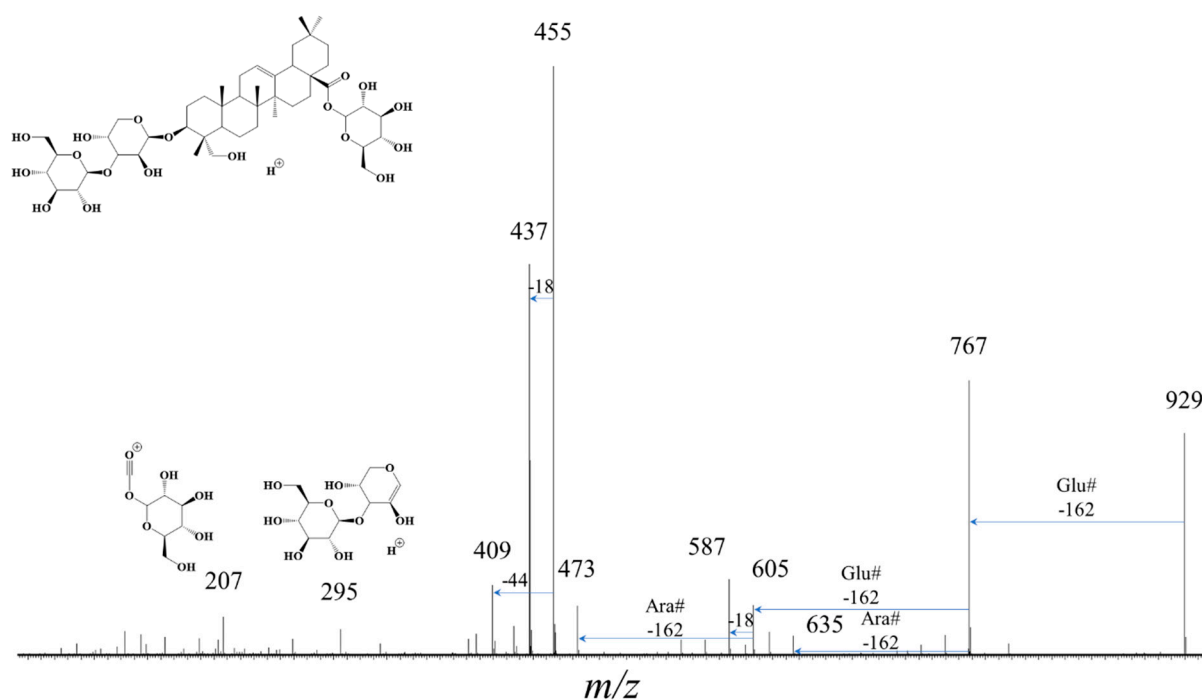

**Figure S5.** LC-MSMS(+) analysis of *Chenopodium quinoa* husk saponin extract: CID spectrum (10 eV) recorded for the  $m/z$  929 precursor ions  $[M+H]^+$  at 6.58 min retention time (Saponin I).

|                                |                                  |                                |   |
|--------------------------------|----------------------------------|--------------------------------|---|
| <b>Monodesmosidic saponins</b> | SOCl <sub>2</sub> - MeOH<br>0 °C | <b>Monodesmosidic saponins</b> | ✗ |
|                                | MeOH<br>Reflux Δ                 | <b>Monodesmosidic saponins</b> | ✗ |
|                                | MeOH<br>IR lamp Δ                | <b>Monodesmosidic saponins</b> | ✗ |
|                                | ATPS - MeOH<br>IR lamp Δ         | <b>Monodesmosidic saponins</b> | ✗ |
|                                | Dowex™ resin<br>MeOH, reflux Δ   | <b>Monodesmosidic saponins</b> | ✗ |
|                                | MeOH<br>Microwave Δ              | <b>Monodesmosidic saponins</b> | ✗ |
|                                | ATPS - MeOH<br>Microwave Δ       | <b>Monodesmosidic saponins</b> | ✗ |
|                                | Ac. acid - MeOH<br>Microwave Δ   | <b>Monodesmosidic saponins</b> | ✗ |

**Figure S6.** Direct esterification of monodesmosidic saponins (from the hydrolyzed extract - HE): unsuccessful attempts. Invariably the starting material is recovered after reaction.

|                              |                                                               |                              |   |
|------------------------------|---------------------------------------------------------------|------------------------------|---|
| <b>Bidesmosidic saponins</b> | MeOH<br>Reflux Δ                                              | <b>Bidesmosidic saponins</b> | ✗ |
|                              | ATPS - MeOH<br>Reflux Δ                                       | <b>Bidesmosidic saponins</b> | ✗ |
|                              | MeOK - MeOH <sub>anh</sub><br>N <sub>2</sub> - microwave Δ    | <b>Bidesmosidic saponins</b> | ✗ |
|                              | MeOK - MeOH <sub>anh</sub><br>N <sub>2</sub> - 60 °C - 60 min | <b>Methylated saponins</b>   | ✓ |

**Figure S7.** Methanolysis of the bidesmosidic saponins (from the natural extract - NE). All attempts under neutral/acidic conditions failed and only the transesterification using MeOK in anhydrous methanol under inert atmosphere afforded the expected C28-methylated saponins.
